# Supplementary material for: Unique magnetic properties and magnetization reversal process of CoFe2O4 nanotubes fabricated by electrospinning
Source: Royal Society of Chemistry journal article supplement (doi:10.1039/c2nr30487b), 2012-01-01
Supplement: c2nr30487b.pdf [file c2nr30487b.pdf]

## Supplementary Information

### Unique magnetic properties and magnetization reversal process of $\text{CoFe}_2\text{O}_4$ nanotubes fabricated by electrospinning†

Jiecai Fu,<sup>‡a</sup> Junli Zhang,<sup>‡a</sup> Yong Peng,<sup>a</sup> Jianguo Zhao,<sup>b</sup> Guoguo Tan,<sup>a</sup> Nigel J Mellors,<sup>c</sup> Erqing Xie<sup>\*a</sup> and Weihua Han<sup>a</sup>

<sup>‡</sup>These authors contributed equally to this work.

E-mail: [xieeq@lzu.edu.cn](mailto:xieeq@lzu.edu.cn)

*This file contains supplementary Figures S1 to S2 with legends.*

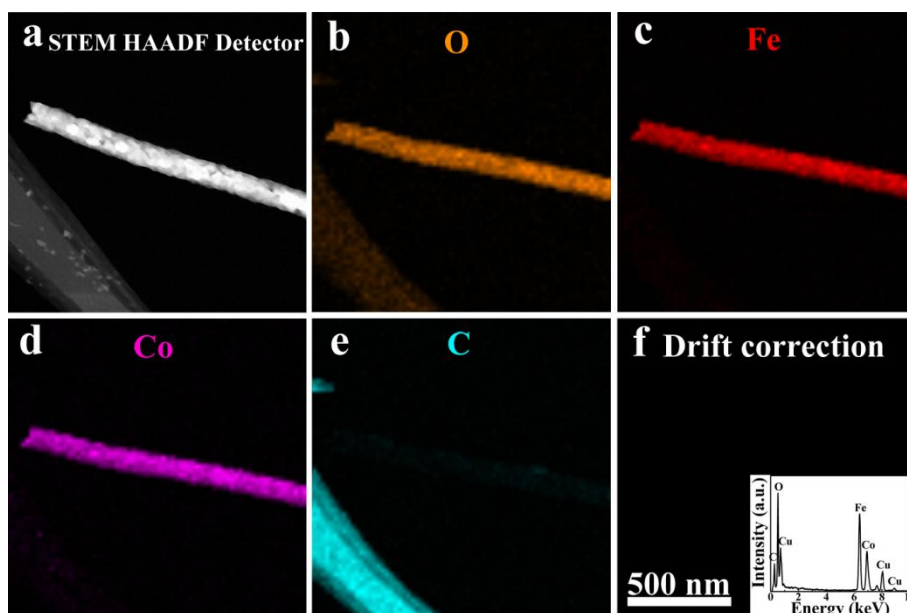

**Figure S1** EDX elemental mappings of a single  $\text{CoFe}_2\text{O}_4$  nanotube performed with a drift corrected system: (a) HAADF-STEM image; (b) oxygen element map; (c) iron element; (d) cobalt element; (e) carbon element map; (f) a drift correction image, Inset, EDX spectrum collected from the a cluster of  $\text{CoFe}_2\text{O}_4$  nanotubes. All the scale bars are 500 nm.

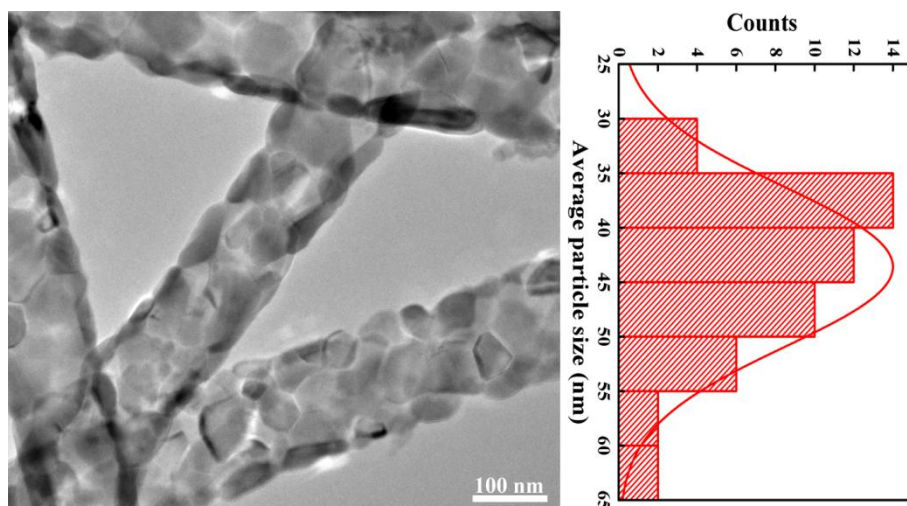

**Figure S2** (a) TEM image showing the particles stacking; (b) Statistics analysis of CoFe<sub>2</sub>O<sub>4</sub> nanoparticles size included in the CoFe<sub>2</sub>O<sub>4</sub> nanotubes.
